# Supplementary material for: Cross-Species Integrative Functional Genomics in GeneWeaver Reveals a Role for Pafah1b1 in Altered Response to Alcohol
Source: Front Behav Neurosci. 2016 Jan 21;10:1. doi: 10.3389/fnbeh.2016.00001 (PMC4720795; doi:10.3389/fnbeh.2016.00001)
Supplement: Table S1 — The 32 gene set from genome wide functional genomic studies retrieved from GeneWeaver.org. [file TableS1.XLSX]

## Sheet: Sheet1
GeneSet ID	Set Name	PMID	Author, Year
GS216869	Drosophilia sex x line Differential Expression	17973985	Moroza et al., 2007
GS1235	Transcriptional profiling of the rat frontal cortex following administration of the mGlu5 receptor antagonists MPEP and MTEP	18346726	Gass et al., 2008
GS128637	Copy Number Variations effecting Alcoholism in Korean Population	21790672	Bae et al., 2012
GS213106	Chronic Alcohol HepG2	22150570	Pochareddy et al.,2012
GS115095	Association Results (p < 0.05) for 1,014 SNPs (Genes they are in) Associated with Addiction and Alcohol Consumption in Young Women	21143251	Agrawal et al., 2011
GS135216	Gene Coexpression Networks in Human Brain Identify Epigenetic Modifications in Alcohol Dependence	22302827	Ponomarev et al., 2012
GS37188	Positional candidate on Chromosome 11 (30-110 Mb) for dominant deviation measuring EtOH consumption during DID, 24 hour access and BEC.	20033183	Phillips et al., 2010
GS37187	Positional candidate on chromosome 11 (59-79Mb) for overdominant effect for 24-hour, 2 bottle choice 30g/kg EtOH excessive consumption.	20033183	Phillips et al.,2010
GS75606	Frontal cortex gene expression in alcoholic vs nonalcoholic humans 2	11141048	Lewohl et al, 2000
GS127340	Transcripts enriched in blood of C57BL/6J mice drinking to intoxication.	21223303	Mulligan et al., 2011
GS127341	Transcripts differentially regulated in striatum of C57BL/6J mice drinking to intoxication.	21223303	Mulligan et al., 2011
GS127342	Transcripts differentially regulated in frontal cortex of C57BL/6J mice drinking to intoxication.	21223303	Mulligan et al., 2011
GS127343	Transcripts differentially regulated in olfactory bulb of C57BL/6J mice drinking to intoxication.	21223303	Mulligan et al., 2011
GS127344	Transcripts differentially regulated in ventral midbrain of C57BL/6J mice drinking to intoxication.	21223303	Mulligan et al., 2011
GS127345	Transcripts differentially regulated in cerebellum of C57BL/6J mice drinking to intoxication.	21223303	Mulligan et al., 2011
GS127346	Transcripts differentially regulated in hippocampus of C57BL/6J mice drinking to intoxication.	21223303	Mulligan et al., 2011
GS127354	Human genes or their orthologs in 5 or more datesets of all species.	18978021	Guo et al., 2009
GS75605	Frontal cortex gene expression in alcoholic vs nonalcoholic humans 1	11141048	Lewohl et al, 2000
GS127372	Human GWAS alcohol heaviness of drinking factor score	21529783	Heath et al., 2011
GS127373	Human GWAS alcohol use disorder factor score	21529783	Heath et al., 2011
GS127374	Human GWAS alcohol dependence factor scores	21529783	Heath et al., 2011
GS127375	Human GWAS alcohol 12-month weekly alcohol consumption	21529783	Heath et al., 2011
GS75562	Differentially expressed alcohol sensitivity in Drosophila melanogaster (line)	17973985	Morozova et al.,2007
GS31782	Gene Expression Correlations with Hippocampus Consortium M430v2 (Jun06) RMA for Localization of genes affecting alcohol drinking in mice Phillips et al (1994).	7978106	Phillips et al., 1994
GS66288	Striatum Gene expression correlates of Number of entries into closed arms of plus maze [Ethanol] in Females & Males BXD	19958391	Philip et al., 2010
GS127422	Cortex and Striatum B6J vs B6C	18397380	Mulligan et al., 2011
GS127424	Hippocampus B6J vs B6C	18397380	Mulligan et al., 2011
GS127425	Ventral Brain Region B6J vs B6C	18397380	Mulligan et al., 2011
GS127426	Cerebellum B6J vs B6C	18397380	Mulligan et al., 2011
GS127417	Chronic alcohol exposure induced gene expression changes in thezebrafish brain	20654657	Pan et al., 2011
GS127590	Ethanol-Responsive Gene Expression in Neural Cells	11093800	Thibault et al.,2000
GS127593	Alcoholic superior frontal gyrus Proteomics	19924264	Etheridge et al., 2009
